# Supplementary material for: Phosphorescent Pt(ii) complexes bearing cyclometalated difluorophenylpyridinate and diphosphine building blocks
Source: Royal Society of Chemistry journal article supplement (doi:10.1039/d2nj05555d), 2022-12-09
Supplement: d2nj05555d2.pdf [file d2nj05555d2.pdf]

70

Complex 2a, ground state, CH<sub>2</sub>Cl<sub>2</sub>

|    |             |             |             |
|----|-------------|-------------|-------------|
| C  | 2.08858300  | 1.20211800  | -0.04180000 |
| C  | 2.21569300  | 2.62124000  | 0.00972600  |
| C  | 3.23852900  | 0.42248500  | -0.18988900 |
| C  | 3.50100500  | 3.17571500  | -0.08358400 |
| C  | 0.97487500  | 3.39551400  | 0.14780700  |
| C  | 4.48716300  | 1.03392000  | -0.27498700 |
| C  | 4.65014500  | 2.41035200  | -0.22256400 |
| C  | 0.86925900  | 4.78863200  | 0.27081900  |
| C  | -1.36403700 | 3.21015800  | 0.31850800  |
| C  | -0.38073900 | 5.38203600  | 0.41692700  |
| C  | -1.52311200 | 4.58340400  | 0.44649700  |
| N  | -0.15901800 | 2.63261100  | 0.16422600  |
| H  | 3.19986600  | -0.65890000 | -0.25284300 |
| H  | 5.62532600  | 2.87640100  | -0.29232700 |
| H  | 1.76115600  | 5.39592700  | 0.25678800  |
| H  | -2.21630200 | 2.54317700  | 0.34529000  |
| H  | -0.45756900 | 6.46059800  | 0.51227500  |
| H  | -2.51491200 | 5.00381200  | 0.56608300  |
| P  | 0.44222000  | -1.75173400 | 0.05968800  |
| Pt | 0.15720100  | 0.54304500  | 0.02496000  |
| P  | -2.06455400 | -0.46019400 | -0.10300300 |
| C  | 1.06141100  | -2.47215400 | 1.61826600  |
| C  | 1.83368000  | -1.69175400 | 2.49244900  |
| C  | 0.75784700  | -3.80247100 | 1.95956900  |
| C  | 2.30460600  | -2.23896500 | 3.68776000  |
| H  | 2.06017000  | -0.66069100 | 2.24145600  |
| C  | 1.23128000  | -4.34226300 | 3.15533600  |
| H  | 0.15493400  | -4.41973100 | 1.29929500  |
| C  | 2.00535800  | -3.56180300 | 4.01919600  |
| H  | 2.90025400  | -1.62849600 | 4.35989800  |
| H  | 0.99306200  | -5.36999100 | 3.41255400  |
| H  | 2.37002700  | -3.98434600 | 4.95091500  |
| C  | 1.32982500  | -2.52944600 | -1.33905200 |
| C  | 2.18509900  | -3.62912200 | -1.17453100 |
| C  | 1.13149300  | -1.99025400 | -2.62269500 |
| C  | 2.82246200  | -4.18932200 | -2.28422700 |
| H  | 2.36063000  | -4.04791900 | -0.18954000 |
| C  | 1.76408200  | -2.55996000 | -3.72645500 |
| H  | 0.49103300  | -1.12233800 | -2.75566100 |
| C  | 2.61082700  | -3.65998900 | -3.55838600 |
| H  | 3.48548600  | -5.03862700 | -2.14844700 |
| H  | 1.60343800  | -2.13959100 | -4.71480700 |
| H  | 3.10876100  | -4.09811500 | -4.41846500 |
| C  | -3.23973200 | -0.29242500 | 1.29454200  |
| C  | -4.63231300 | -0.37603500 | 1.14359900  |
| C  | -2.69563700 | -0.05557700 | 2.56959100  |
| C  | -5.46504200 | -0.24159000 | 2.25646700  |
| H  | -5.07060700 | -0.53955500 | 0.16480500  |
| C  | -3.53239600 | 0.06864800  | 3.67860600  |
| H  | -1.61909600 | 0.03637300  | 2.69034800  |
| C  | -4.91827600 | -0.02371500 | 3.52309900  |
| H  | -6.54193400 | -0.30583900 | 2.13062100  |

|   |             |             |             |
|---|-------------|-------------|-------------|
| H | -3.10268800 | 0.24760000  | 4.65989500  |
| H | -5.56999000 | 0.08133700  | 4.38565600  |
| C | -3.00702600 | -0.33113300 | -1.66357700 |
| C | -3.86644500 | -1.35846500 | -2.09158100 |
| C | -2.85616600 | 0.81631800  | -2.45810100 |
| C | -4.57039600 | -1.22980700 | -3.28908900 |
| H | -3.98893200 | -2.25937100 | -1.49674700 |
| C | -3.56401500 | 0.94078500  | -3.65535800 |
| H | -2.18017300 | 1.60752300  | -2.14809700 |
| C | -4.42128100 | -0.08014400 | -4.07046600 |
| H | -5.23224000 | -2.02791000 | -3.61209800 |
| H | -3.43933100 | 1.83134100  | -4.26418300 |
| H | -4.96853000 | 0.01562400  | -5.00372600 |
| C | -1.36780000 | -2.20680300 | -0.06351400 |
| H | -1.71222600 | -2.77963300 | 0.80115800  |
| H | -1.59340500 | -2.76565900 | -0.97534000 |
| F | 5.58231400  | 0.26145400  | -0.41489300 |
| F | 3.67628500  | 4.51759000  | -0.04565900 |

73

Complex 2b, ground state, CH2C12

|    |             |             |             |
|----|-------------|-------------|-------------|
| C  | 0.06874700  | 3.31028700  | -0.59714800 |
| C  | 2.23195700  | 2.54624100  | -0.09628000 |
| C  | 0.57580600  | 4.60652800  | -0.77787000 |
| C  | -1.33815600 | 2.90804000  | -0.70856000 |
| C  | 2.78345800  | 3.80888900  | -0.26125800 |
| C  | 1.93365300  | 4.85563700  | -0.61322500 |
| C  | -2.37963300 | 3.76567700  | -1.09832700 |
| C  | -2.98814600 | 1.14146300  | -0.49357000 |
| C  | -3.70303100 | 3.36321400  | -1.19484400 |
| C  | -3.97624900 | 2.04013400  | -0.88501800 |
| H  | 2.85359100  | 1.70966400  | 0.19030000  |
| H  | -0.09441200 | 5.41024100  | -1.03890900 |
| H  | 3.84722000  | 3.95536000  | -0.11383000 |
| H  | 2.31947000  | 5.86055100  | -0.75325500 |
| H  | -3.30277800 | 0.13160600  | -0.26483300 |
| H  | -4.47690500 | 4.05664600  | -1.50013100 |
| P  | 1.98743400  | -0.97010500 | 0.29929400  |
| Pt | -0.00902000 | 0.39122800  | 0.02522500  |
| P  | -1.11923700 | -1.57702300 | 0.51225400  |
| C  | 3.07722400  | -0.45521300 | 1.68924500  |
| C  | 2.46056600  | 0.08638200  | 2.83163300  |
| C  | 4.47447000  | -0.58894300 | 1.66490600  |
| C  | 3.22501900  | 0.46087300  | 3.93697600  |
| H  | 1.38343600  | 0.22929000  | 2.84834700  |
| C  | 5.23613500  | -0.20312000 | 2.77014300  |
| H  | 4.97393000  | -0.98433500 | 0.78695800  |
| C  | 4.61453200  | 0.31643800  | 3.90773200  |
| H  | 2.73624600  | 0.87452000  | 4.81428800  |
| H  | 6.31678800  | -0.30760600 | 2.73828900  |
| H  | 5.21080500  | 0.61566000  | 4.76487100  |
| C  | 3.03521500  | -1.19057500 | -1.18699000 |
| C  | 2.89253100  | -0.30962100 | -2.27103300 |
| C  | 3.95184400  | -2.25354800 | -1.28459400 |
| C  | 3.66483800  | -0.47626400 | -3.42268700 |

|   |             |             |             |
|---|-------------|-------------|-------------|
| H | 2.16810000  | 0.49744600  | -2.22389000 |
| C | 4.72056000  | -2.41656400 | -2.43738600 |
| H | 4.06688300  | -2.96034200 | -0.46810100 |
| C | 4.58074500  | -1.52654800 | -3.50597600 |
| H | 3.54389600  | 0.21097800  | -4.25488700 |
| H | 5.42490900  | -3.24074500 | -2.50123900 |
| H | 5.17918200  | -1.65703600 | -4.40294900 |
| C | -2.55468100 | -1.44164400 | 1.64457600  |
| C | -3.75129000 | -2.14386300 | 1.44015600  |
| C | -2.42317200 | -0.61460800 | 2.77380500  |
| C | -4.79760100 | -2.02598500 | 2.35888300  |
| H | -3.87639200 | -2.77662600 | 0.56805400  |
| C | -3.46789100 | -0.50621000 | 3.69028000  |
| H | -1.51032200 | -0.04563300 | 2.92897900  |
| C | -4.65747400 | -1.21163600 | 3.48352600  |
| H | -5.72174900 | -2.57089500 | 2.19013600  |
| H | -3.35630100 | 0.13418000  | 4.56030700  |
| H | -5.47310600 | -1.12147100 | 4.19504700  |
| C | -1.61933900 | -2.55534100 | -0.95188300 |
| C | -1.92262300 | -3.92518700 | -0.84791300 |
| C | -1.67960000 | -1.93315900 | -2.20957000 |
| C | -2.28486000 | -4.65247000 | -1.98192700 |
| H | -1.88150500 | -4.43173200 | 0.11161600  |
| C | -2.04390600 | -2.66560100 | -3.34101000 |
| H | -1.43760900 | -0.87905000 | -2.30061900 |
| C | -2.34652800 | -4.02397100 | -3.22875800 |
| H | -2.51603100 | -5.70955000 | -1.89049200 |
| H | -2.08653100 | -2.17417500 | -4.30848400 |
| H | -2.62677700 | -4.59367400 | -4.10999100 |
| C | 0.07667900  | -2.65325000 | 1.44814300  |
| H | -0.34050500 | -3.65654600 | 1.58005100  |
| H | 0.17725000  | -2.21149200 | 2.44540200  |
| C | 1.42564500  | -2.70238700 | 0.72548400  |
| H | 2.17820500  | -3.20844500 | 1.33732000  |
| H | 1.33449500  | -3.25045600 | -0.21802900 |
| F | -2.12888400 | 5.05933600  | -1.41178700 |
| F | -5.25086000 | 1.60906500  | -0.96776100 |
| C | -1.65509400 | 1.55173500  | -0.39818600 |
| N | 0.92038500  | 2.29345700  | -0.26628600 |

77

Complex 2c, ground state, CH2Cl2

|    |             |             |             |
|----|-------------|-------------|-------------|
| Pt | 0.20977800  | 0.64337100  | -0.03486100 |
| P  | -2.02930700 | -0.28804800 | -0.17780600 |
| P  | 0.81959800  | -1.58110600 | -0.23455300 |
| F  | 3.39370700  | 4.88501200  | 0.51045400  |
| F  | 5.67148600  | 0.80791900  | 0.34661300  |
| N  | -0.27110500 | 2.71562100  | 0.14918600  |
| C  | -1.51914500 | 3.22026700  | 0.15584200  |
| H  | -2.32893800 | 2.51341200  | 0.05229300  |
| C  | -1.78480500 | 4.57722100  | 0.27335600  |
| H  | -2.81117900 | 4.92564500  | 0.27434000  |
| C  | -0.70550600 | 5.45111300  | 0.38188900  |
| H  | -0.86350100 | 6.52130700  | 0.47108300  |
| C  | 0.58724400  | 4.94004400  | 0.37497500  |

|   |             |             |             |
|---|-------------|-------------|-------------|
| H | 1.43249000  | 5.60443600  | 0.45895200  |
| C | 0.80022500  | 3.55741900  | 0.26197700  |
| C | 2.10103500  | 2.88092900  | 0.26137000  |
| C | 2.09542500  | 1.45990500  | 0.13505400  |
| C | 3.33556400  | 3.53664700  | 0.39703400  |
| C | 4.55260900  | 2.87314300  | 0.42719200  |
| H | 5.48300900  | 3.41693900  | 0.53443900  |
| C | 4.51084200  | 1.49273700  | 0.31547000  |
| C | 3.32004300  | 0.78686500  | 0.16976300  |
| H | 3.39477200  | -0.28794300 | 0.07728700  |
| C | -3.25960500 | 0.58087100  | -1.22777700 |
| C | -2.84310600 | 1.00563500  | -2.50262500 |
| H | -1.82227300 | 0.82431100  | -2.82973500 |
| C | -3.73464600 | 1.66321500  | -3.34811900 |
| H | -3.40619800 | 1.98457600  | -4.33218500 |
| C | -5.04490100 | 1.91396200  | -2.92686700 |
| H | -5.73710100 | 2.43104800  | -3.58499100 |
| C | -5.46058200 | 1.50359000  | -1.65940300 |
| H | -6.47613500 | 1.69881200  | -1.32759200 |
| C | -4.57310100 | 0.83801700  | -0.80870700 |
| H | -4.90660100 | 0.52250400  | 0.17449200  |
| C | -2.81792300 | -0.56960400 | 1.45692800  |
| C | -2.46888300 | 0.28153500  | 2.51923100  |
| H | -1.73893200 | 1.07069400  | 2.36712800  |
| C | -3.04765700 | 0.11257800  | 3.77814200  |
| H | -2.77000100 | 0.77704700  | 4.59106000  |
| C | -3.97186900 | -0.91236600 | 3.99166200  |
| H | -4.41792100 | -1.04709700 | 4.97278800  |
| C | -4.31654900 | -1.76953500 | 2.94346300  |
| H | -5.02892200 | -2.57291600 | 3.10652000  |
| C | -3.74366800 | -1.60205800 | 1.68189500  |
| H | -4.01437000 | -2.28343900 | 0.88214600  |
| C | -1.85811400 | -1.93409600 | -0.97409200 |
| C | -2.93204100 | -2.60042300 | -1.57985300 |
| H | -3.91690900 | -2.14389400 | -1.59663600 |
| C | -2.73570500 | -3.83968300 | -2.19081400 |
| H | -3.57273600 | -4.34797600 | -2.65960000 |
| C | -1.46222300 | -4.41175300 | -2.21793600 |
| H | -1.30305600 | -5.36717000 | -2.70838700 |
| C | -0.38247600 | -3.74553600 | -1.63622600 |
| H | 0.60999300  | -4.18063200 | -1.69762900 |
| C | -0.57437100 | -2.50896200 | -1.00402700 |
| C | 2.23494300  | -1.97455100 | -1.33060000 |
| C | 2.29168500  | -1.34136500 | -2.58424700 |
| H | 1.53140300  | -0.61577200 | -2.86129000 |
| C | 3.32710900  | -1.63529800 | -3.46919900 |
| H | 3.36511000  | -1.14296600 | -4.43645500 |
| C | 4.31737600  | -2.55549800 | -3.10888600 |
| H | 5.12674500  | -2.77901100 | -3.79778100 |
| C | 4.26768400  | -3.18282300 | -1.86332500 |
| H | 5.03632200  | -3.89529100 | -1.57882700 |
| C | 3.22923500  | -2.89606700 | -0.97248800 |
| H | 3.20068300  | -3.38749600 | -0.00542400 |
| C | 1.13659600  | -2.37172800 | 1.39213800  |

|   |            |             |            |
|---|------------|-------------|------------|
| C | 1.62937200 | -1.58319000 | 2.44587500 |
| H | 1.80367400 | -0.52315300 | 2.29427200 |
| C | 1.89069000 | -2.15724500 | 3.69090100 |
| H | 2.27128800 | -1.53805700 | 4.49786500 |
| C | 1.65693300 | -3.51825800 | 3.89901600 |
| H | 1.85615800 | -3.96264000 | 4.86985000 |
| C | 1.15930200 | -4.30655700 | 2.85856600 |
| H | 0.96868800 | -5.36389800 | 3.01682600 |
| C | 0.89779400 | -3.73898100 | 1.61073200 |
| H | 0.49941800 | -4.36341900 | 0.81811000 |

93

Complex 3a, ground state, CH2Cl2

|    |             |             |             |
|----|-------------|-------------|-------------|
| Pt | 3.15962300  | 0.48642300  | 0.23242600  |
| Pt | -3.23720100 | -0.37099600 | 0.41996800  |
| Cl | 2.47575700  | 2.34661700  | 1.78044800  |
| Cl | -2.81203200 | -1.70816600 | 2.52941500  |
| P  | 1.34542700  | -0.80760100 | 0.89720500  |
| P  | -1.44937300 | 1.01918100  | 0.98121900  |
| F  | 4.57093600  | -4.52580100 | -1.30887200 |
| F  | 7.16072200  | -0.97544300 | -2.91329200 |
| F  | -6.64400200 | 0.03273200  | -3.60979100 |
| F  | -4.23723700 | 3.94403700  | -2.71820700 |
| N  | 4.73485900  | 1.64320700  | -0.59214400 |
| N  | -4.71312300 | -1.73478000 | -0.25261200 |
| C  | 4.87230200  | 2.96850400  | -0.41223900 |
| H  | 4.18311900  | 3.41745700  | 0.29206000  |
| C  | 5.83716600  | 3.71126400  | -1.08086900 |
| H  | 5.91512900  | 4.77774100  | -0.90203600 |
| C  | 6.67934900  | 3.05070500  | -1.97403300 |
| H  | 7.44154900  | 3.59529000  | -2.52294300 |
| C  | 6.53843600  | 1.67965600  | -2.16309900 |
| H  | 7.18062700  | 1.15576200  | -2.85416300 |
| C  | 5.55345200  | 0.97463400  | -1.45573800 |
| C  | 5.28696800  | -0.46443100 | -1.51689600 |
| C  | 4.16635500  | -0.94704200 | -0.77167700 |
| C  | 3.96031200  | -2.32991900 | -0.70840800 |
| H  | 3.15486500  | -2.76889200 | -0.13611000 |
| C  | 4.80511900  | -3.19936600 | -1.38914900 |
| C  | 5.87743400  | -2.76272700 | -2.15313600 |
| H  | 6.52689600  | -3.44844300 | -2.68293500 |
| C  | 6.09406400  | -1.39416500 | -2.19001300 |
| C  | -0.03958900 | 0.08392000  | 1.79431500  |
| H  | 0.48125400  | 0.78782200  | 2.44567000  |
| H  | -0.54061100 | -0.66248600 | 2.41674000  |
| C  | 1.89384200  | -1.94332000 | 2.24741400  |
| C  | 1.78298200  | -3.33978200 | 2.19490700  |
| H  | 1.33794600  | -3.82678500 | 1.33437700  |
| C  | 2.25024500  | -4.12419400 | 3.25389900  |
| H  | 2.16028300  | -5.20524600 | 3.19748200  |
| C  | 2.82606100  | -3.52455300 | 4.37393500  |
| H  | 3.18573600  | -4.13651700 | 5.19618500  |
| C  | 2.94405100  | -2.13245900 | 4.43153500  |
| H  | 3.39720100  | -1.65774500 | 5.29715000  |
| C  | 2.48943100  | -1.34596900 | 3.37393600  |

|   |             |             |             |
|---|-------------|-------------|-------------|
| H | 2.60700900  | -0.26660200 | 3.41905200  |
| C | 0.54962100  | -1.83336000 | -0.40227100 |
| C | -0.48852000 | -2.72497400 | -0.07908400 |
| H | -0.84750100 | -2.80974400 | 0.94079800  |
| C | -1.08961000 | -3.49748200 | -1.07523800 |
| H | -1.88639800 | -4.18616000 | -0.80975300 |
| C | -0.67619400 | -3.37790600 | -2.40394800 |
| H | -1.14591600 | -3.97995900 | -3.17669500 |
| C | 0.33922300  | -2.47824000 | -2.73673400 |
| H | 0.65998100  | -2.37251000 | -3.76904600 |
| C | 0.95015300  | -1.71187200 | -1.74286800 |
| H | 1.73744000  | -1.01525000 | -2.00699000 |
| C | -0.71201800 | 1.99617800  | -0.39507000 |
| C | -0.53581000 | 1.36822700  | -1.63911000 |
| H | -0.85607600 | 0.34156100  | -1.77740500 |
| C | 0.02373200  | 2.06377000  | -2.71094500 |
| H | 0.15486500  | 1.56353400  | -3.66624000 |
| C | 0.39150400  | 3.40392000  | -2.56098500 |
| H | 0.81386400  | 3.95057200  | -3.39945400 |
| C | 0.19822300  | 4.04184000  | -1.33427000 |
| H | 0.46944600  | 5.08669000  | -1.21296700 |
| C | -0.34699200 | 3.34303100  | -0.25436200 |
| H | -0.48997600 | 3.85552800  | 0.68949900  |
| C | -1.93487500 | 2.22571200  | 2.28562600  |
| C | -3.30405400 | 2.45279300  | 2.50515200  |
| H | -4.03850000 | 1.90762600  | 1.92037600  |
| C | -3.72547000 | 3.36401800  | 3.47545700  |
| H | -4.78770900 | 3.52596300  | 3.63452700  |
| C | -2.78572400 | 4.05644700  | 4.24105500  |
| H | -3.11315000 | 4.76208800  | 4.99939800  |
| C | -1.42208700 | 3.83739500  | 4.03045000  |
| H | -0.68513400 | 4.37338800  | 4.62173400  |
| C | -0.99514600 | 2.92910500  | 3.06029700  |
| H | 0.06971600  | 2.78717700  | 2.90414500  |
| C | -4.93249100 | -2.94221200 | 0.29672300  |
| H | -4.37979200 | -3.14816800 | 1.20503800  |
| C | -5.80990700 | -3.86245600 | -0.26290700 |
| H | -5.95987100 | -4.82355100 | 0.21590600  |
| C | -6.47145600 | -3.51472300 | -1.43994100 |
| H | -7.15848000 | -4.20852900 | -1.91478700 |
| C | -6.24686000 | -2.26565500 | -2.00974500 |
| H | -6.75013700 | -1.98375400 | -2.92173300 |
| C | -5.35892700 | -1.36825800 | -1.39775800 |
| C | -5.03278000 | -0.01110000 | -1.84201000 |
| C | -4.02630100 | 0.68750800  | -1.10375500 |
| C | -3.79078900 | 2.03134000  | -1.41512600 |
| H | -3.06374300 | 2.62873900  | -0.88315500 |
| C | -4.49315700 | 2.64733800  | -2.44501300 |
| C | -5.44362300 | 1.98727600  | -3.21001300 |
| H | -5.97886300 | 2.47550100  | -4.01492100 |
| C | -5.69332700 | 0.66467100  | -2.87909600 |

96

Complex 3b, ground state, CH2Cl2

|    |            |             |             |
|----|------------|-------------|-------------|
| Pt | 4.29075100 | -0.55318500 | -0.47972200 |
|----|------------|-------------|-------------|

|    |             |             |             |
|----|-------------|-------------|-------------|
| C1 | 4.81429000  | -2.70692600 | -1.64207300 |
| C  | 4.24582800  | 1.19500600  | 0.52268300  |
| C  | 5.11958500  | 2.19611300  | -0.00579900 |
| C  | 3.55241100  | 1.48114000  | 1.70589000  |
| C  | 5.16756700  | 3.44589200  | 0.62910600  |
| C  | 5.98994100  | 1.79450100  | -1.11605200 |
| C  | 3.65557000  | 2.73750100  | 2.29428900  |
| H  | 2.95030300  | 0.73965700  | 2.21530400  |
| C  | 4.43865600  | 3.75344300  | 1.76830000  |
| C  | 6.89102400  | 2.60959300  | -1.81637100 |
| H  | 4.50478900  | 4.73065600  | 2.23016600  |
| C  | 7.69305700  | 2.05902400  | -2.81148700 |
| H  | 6.95889100  | 3.66056200  | -1.58086900 |
| C  | 6.67113700  | -0.06014900 | -2.39136700 |
| C  | 7.59193900  | 0.69958800  | -3.10263500 |
| H  | 8.39085500  | 2.69089900  | -3.35249400 |
| H  | 6.52562700  | -1.11781800 | -2.57574500 |
| H  | 8.20239700  | 0.23052000  | -3.86605700 |
| N  | 5.89470500  | 0.46958000  | -1.43116700 |
| C  | 1.59025000  | -2.78727100 | -0.66813500 |
| C  | 1.39153200  | -2.55197800 | -2.03921100 |
| C  | 1.15832000  | -3.99661900 | -0.10926300 |
| C  | 0.76529700  | -3.51067200 | -2.83371400 |
| H  | 1.73698000  | -1.62490700 | -2.48782400 |
| C  | 0.54139700  | -4.96086400 | -0.91238600 |
| H  | 1.29862500  | -4.19354500 | 0.94819600  |
| C  | 0.34187600  | -4.71986800 | -2.27196900 |
| H  | 0.61689500  | -3.31856700 | -3.89253500 |
| H  | 0.21530400  | -5.89750600 | -0.46935400 |
| H  | -0.13997500 | -5.46924400 | -2.89355600 |
| C  | 2.49875900  | -2.10019400 | 2.04584200  |
| C  | 1.70050800  | -1.69716400 | 3.12682200  |
| C  | 3.53677400  | -3.02446600 | 2.26702600  |
| C  | 1.93137600  | -2.21507700 | 4.40461900  |
| H  | 0.90048200  | -0.97748800 | 2.99235600  |
| C  | 3.75490700  | -3.54698700 | 3.54087300  |
| H  | 4.17301200  | -3.32953500 | 1.44051200  |
| C  | 2.95337800  | -3.14166000 | 4.61282700  |
| H  | 1.30814900  | -1.89200500 | 5.23329000  |
| H  | 4.55588800  | -4.26353500 | 3.69803700  |
| H  | 3.12906700  | -3.54421300 | 5.60626200  |
| P  | 2.31530900  | -1.43743900 | 0.34672300  |
| C  | 0.93299600  | -0.17639000 | 0.34993200  |
| H  | 1.04893100  | 0.34812800  | -0.60400000 |
| H  | 1.16307400  | 0.54979500  | 1.12899000  |
| C  | -0.48971300 | -0.73045400 | 0.49124600  |
| H  | -0.64933200 | -1.24880900 | 1.43839000  |
| H  | -0.69723200 | -1.46760200 | -0.28806300 |
| C  | -1.44181300 | 1.41950300  | -1.19256500 |
| C  | -1.45584600 | 0.66819400  | -2.38195100 |
| C  | -1.11483900 | 2.78146500  | -1.25395600 |
| C  | -1.13471000 | 1.26509500  | -3.60051700 |
| H  | -1.72813100 | -0.38384300 | -2.35967300 |
| C  | -0.79980100 | 3.37809000  | -2.47836300 |

|    |             |             |             |
|----|-------------|-------------|-------------|
| H  | -1.11230600 | 3.38968100  | -0.35619500 |
| C  | -0.80519700 | 2.62298300  | -3.65139200 |
| H  | -1.14868500 | 0.67124700  | -4.50983700 |
| H  | -0.55260600 | 4.43531000  | -2.50936400 |
| H  | -0.55928000 | 3.08870100  | -4.60136200 |
| C  | -1.67967300 | 1.65193200  | 1.78840100  |
| C  | -0.52904200 | 2.43654000  | 1.99776900  |
| C  | -2.69375300 | 1.67092800  | 2.76155900  |
| C  | -0.39439000 | 3.20608800  | 3.15410700  |
| H  | 0.26605600  | 2.46286000  | 1.26161000  |
| C  | -2.55995500 | 2.44889000  | 3.91320200  |
| H  | -3.58755100 | 1.07217000  | 2.61570300  |
| C  | -1.40979500 | 3.21408000  | 4.11341700  |
| H  | 0.51114300  | 3.78467700  | 3.30528900  |
| H  | -3.35468500 | 2.45163400  | 4.65353800  |
| H  | -1.30357400 | 3.81386000  | 5.01286000  |
| P  | -1.87605000 | 0.51775300  | 0.35524600  |
| Pt | -3.95802900 | -0.50403100 | 0.21767100  |
| Cl | -3.03715400 | -2.62455600 | 1.19600300  |
| C  | -4.98668200 | 1.10451000  | -0.43389600 |
| C  | -6.32655000 | 0.81722100  | -0.84336100 |
| C  | -4.56039900 | 2.43689200  | -0.45480700 |
| C  | -7.13196800 | 1.87683800  | -1.28754100 |
| C  | -6.77894900 | -0.57048300 | -0.71012200 |
| C  | -5.41251500 | 3.44284900  | -0.89656800 |
| H  | -3.57214600 | 2.73323900  | -0.13269100 |
| C  | -6.70591500 | 3.19529000  | -1.33169600 |
| C  | -8.02896800 | -1.08676100 | -1.08311100 |
| H  | -7.36052300 | 3.98505000  | -1.67875100 |
| C  | -8.31722700 | -2.43023600 | -0.86543000 |
| H  | -8.76210100 | -0.43963000 | -1.53900300 |
| C  | -6.13288200 | -2.69383700 | 0.06645500  |
| C  | -7.35796400 | -3.25212800 | -0.27621800 |
| H  | -9.28505700 | -2.82780700 | -1.15560700 |
| H  | -5.33876300 | -3.27449100 | 0.51961700  |
| H  | -7.54272100 | -4.30348400 | -0.08651200 |
| N  | -5.85132500 | -1.39640500 | -0.14410600 |
| F  | 2.95706900  | 2.98519100  | 3.42540900  |
| F  | 5.96518700  | 4.42843700  | 0.14591200  |
| F  | -8.40403900 | 1.64633300  | -1.69472400 |
| F  | -4.96391100 | 4.71569700  | -0.90403700 |

70

Complex 2a, ground state, gas phase

|   |             |            |             |
|---|-------------|------------|-------------|
| C | 2.07066400  | 1.23550000 | -0.02666300 |
| C | 2.17312100  | 2.65525000 | 0.04145200  |
| C | 3.22977400  | 0.47514500 | -0.17983800 |
| C | 3.45026000  | 3.23220100 | -0.03931000 |
| C | 0.92149700  | 3.40619300 | 0.17903500  |
| C | 4.47135100  | 1.10668600 | -0.25316200 |
| C | 4.61042300  | 2.48535100 | -0.18220100 |
| C | 0.79089100  | 4.79728000 | 0.31625000  |
| C | -1.41743600 | 3.18258400 | 0.33104200  |
| C | -0.46881300 | 5.36753400 | 0.45990500  |
| C | -1.59984600 | 4.55049100 | 0.47267900  |



|    |             |             |             |
|----|-------------|-------------|-------------|
| N  | -0.20181500 | 2.62610300  | 0.17864900  |
| H  | 3.20977000  | -0.60554500 | -0.26150300 |
| H  | 5.57881900  | 2.96672000  | -0.24212000 |
| H  | 1.67453900  | 5.41708100  | 0.31466800  |
| H  | -2.25758100 | 2.49887200  | 0.34513400  |
| H  | -0.56408100 | 6.44388300  | 0.56721900  |
| H  | -2.59867500 | 4.95505100  | 0.59169200  |
| P  | 0.47706700  | -1.74049600 | 0.04274900  |
| Pt | 0.15103600  | 0.54928100  | 0.03225600  |
| P  | -2.05637800 | -0.47761900 | -0.09426500 |
| C  | 1.10595000  | -2.46762300 | 1.59276200  |
| C  | 1.83937000  | -1.67946100 | 2.49306700  |
| C  | 0.84738900  | -3.81585000 | 1.90128900  |
| C  | 2.31375200  | -2.23669400 | 3.68249600  |
| H  | 2.03577100  | -0.63692000 | 2.26434100  |
| C  | 1.32347900  | -4.36475400 | 3.09084800  |
| H  | 0.27959300  | -4.43993700 | 1.21577300  |
| C  | 2.05742600  | -3.57549100 | 3.98149300  |
| H  | 2.88098400  | -1.62175900 | 4.37484600  |
| H  | 1.12116600  | -5.40615200 | 3.32302500  |
| H  | 2.42592600  | -4.00546200 | 4.90824700  |
| C  | 1.35644100  | -2.50218800 | -1.36570600 |
| C  | 2.30787000  | -3.51963200 | -1.20132800 |
| C  | 1.06284700  | -2.02599700 | -2.65600700 |
| C  | 2.94680300  | -4.06230700 | -2.31854900 |
| H  | 2.55649800  | -3.88627700 | -0.21102500 |
| C  | 1.69785600  | -2.57897500 | -3.76568900 |
| H  | 0.34939300  | -1.21652400 | -2.78924700 |
| C  | 2.64105100  | -3.59741400 | -3.59792800 |
| H  | 3.68560700  | -4.84686200 | -2.18468200 |
| H  | 1.46587000  | -2.20815100 | -4.75968500 |
| H  | 3.14127900  | -4.02131700 | -4.46367400 |
| C  | -3.24514800 | -0.35888900 | 1.29434300  |
| C  | -4.61956200 | -0.14873500 | 1.10905400  |
| C  | -2.72741100 | -0.43704300 | 2.60018900  |
| C  | -5.46489800 | -0.03885300 | 2.21587200  |
| H  | -5.03386300 | -0.07089900 | 0.10935400  |
| C  | -3.57814400 | -0.33691700 | 3.69910200  |
| H  | -1.65904700 | -0.56734700 | 2.75726100  |
| C  | -4.94875300 | -0.13760700 | 3.50827500  |
| H  | -6.52810600 | 0.12265100  | 2.06367800  |
| H  | -3.17086700 | -0.40468200 | 4.70364500  |
| H  | -5.60978700 | -0.05329200 | 4.36583000  |
| C  | -2.98768800 | -0.34814300 | -1.65976700 |
| C  | -3.93505500 | -1.31880100 | -2.03284900 |
| C  | -2.73106800 | 0.73039700  | -2.52073000 |
| C  | -4.61717900 | -1.20325200 | -3.24306700 |
| H  | -4.14436000 | -2.16229800 | -1.37986000 |
| C  | -3.41826400 | 0.84215300  | -3.73150000 |
| H  | -1.98743800 | 1.47462400  | -2.25014500 |
| C  | -4.36023200 | -0.12217200 | -4.09205400 |
| H  | -5.34750000 | -1.95613500 | -3.52462600 |
| H  | -3.21271300 | 1.67869900  | -4.39281800 |
| H  | -4.89215200 | -0.03618800 | -5.03502700 |

|   |             |             |             |
|---|-------------|-------------|-------------|
| C | -1.33234100 | -2.21542400 | -0.06870100 |
| H | -1.66145400 | -2.79500100 | 0.79840500  |
| H | -1.56334600 | -2.77199500 | -0.98142400 |
| F | 5.57244800  | 0.35460300  | -0.39705000 |
| F | 3.59967000  | 4.57351300  | 0.01642100  |

73

Complex 2b, ground state, gas phase

|    |             |             |             |
|----|-------------|-------------|-------------|
| C  | 0.04452100  | 3.31267300  | -0.59107200 |
| C  | 2.21507700  | 2.56164200  | -0.09282800 |
| C  | 0.54468600  | 4.61409300  | -0.76511000 |
| C  | -1.35733500 | 2.90426200  | -0.70105000 |
| C  | 2.75729600  | 3.82827900  | -0.24941700 |
| C  | 1.89949500  | 4.87106000  | -0.59787700 |
| C  | -2.40550400 | 3.75998000  | -1.08010300 |
| C  | -2.99513600 | 1.12698700  | -0.48890600 |
| C  | -3.72605900 | 3.34933600  | -1.17243300 |
| C  | -3.99256000 | 2.02280500  | -0.87025000 |
| H  | 2.84113900  | 1.72724000  | 0.19182900  |
| H  | -0.13311500 | 5.41289600  | -1.02241900 |
| H  | 3.81964700  | 3.98306800  | -0.09786600 |
| H  | 2.27858700  | 5.87972900  | -0.73211900 |
| H  | -3.30603500 | 0.11575000  | -0.26212800 |
| H  | -4.50575700 | 4.04001200  | -1.46908300 |
| P  | 1.99664900  | -0.94896300 | 0.28986400  |
| Pt | -0.01192500 | 0.39673700  | 0.01484400  |
| P  | -1.11932100 | -1.57639800 | 0.49663900  |
| C  | 3.07209000  | -0.44750300 | 1.69531700  |
| C  | 2.44894900  | 0.10188300  | 2.83053600  |
| C  | 4.46747800  | -0.60377100 | 1.69101100  |
| C  | 3.20320400  | 0.45989300  | 3.94781700  |
| H  | 1.37425700  | 0.26664200  | 2.83006400  |
| C  | 5.21892400  | -0.23492500 | 2.80843300  |
| H  | 4.97279000  | -1.00182600 | 0.81730100  |
| C  | 4.58970100  | 0.29072100  | 3.93852900  |
| H  | 2.71015400  | 0.88059100  | 4.81941600  |
| H  | 6.29808600  | -0.35711100 | 2.79271300  |
| H  | 5.17830000  | 0.57612900  | 4.80550000  |
| C  | 3.06042600  | -1.16444900 | -1.18441600 |
| C  | 2.94094100  | -0.27081000 | -2.26049500 |
| C  | 3.96960100  | -2.23393900 | -1.28143900 |
| C  | 3.72808500  | -0.43171700 | -3.40237800 |
| H  | 2.22196000  | 0.54126000  | -2.21336100 |
| C  | 4.75300300  | -2.39148500 | -2.42438200 |
| H  | 4.06706200  | -2.95002300 | -0.47007300 |
| C  | 4.63569000  | -1.48858500 | -3.48439600 |
| H  | 3.62515300  | 0.26458900  | -4.22949700 |
| H  | 5.45113900  | -3.22097100 | -2.48858800 |
| H  | 5.24537500  | -1.61462400 | -4.37429900 |
| C  | -2.55102100 | -1.45926200 | 1.63168000  |
| C  | -3.72939300 | -2.19558200 | 1.44073400  |
| C  | -2.43701900 | -0.61462000 | 2.74939600  |
| C  | -4.77313200 | -2.09515700 | 2.36353400  |
| H  | -3.84288900 | -2.83777800 | 0.57369100  |
| C  | -3.47902300 | -0.52425600 | 3.66983900  |

|   |             |             |             |
|---|-------------|-------------|-------------|
| H | -1.54210800 | -0.01304800 | 2.88731300  |
| C | -4.64890400 | -1.26487600 | 3.47779300  |
| H | -5.68445700 | -2.66425500 | 2.20556600  |
| H | -3.38332500 | 0.13162000  | 4.53017100  |
| H | -5.46358700 | -1.18777000 | 4.19177900  |
| C | -1.60519100 | -2.56000000 | -0.96665400 |
| C | -1.87893000 | -3.93656400 | -0.86640000 |
| C | -1.69442000 | -1.93292400 | -2.22008600 |
| C | -2.23916600 | -4.66610500 | -1.99890300 |
| H | -1.81967600 | -4.44553100 | 0.09156300  |
| C | -2.05739000 | -2.66796800 | -3.34990100 |
| H | -1.47968600 | -0.87250600 | -2.30773900 |
| C | -2.32931600 | -4.03250700 | -3.24118900 |
| H | -2.44851200 | -5.72812800 | -1.91095500 |
| H | -2.12496700 | -2.17300500 | -4.31412700 |
| H | -2.60965200 | -4.60337000 | -4.12158400 |
| C | 0.09036300  | -2.64299400 | 1.43100100  |
| H | -0.32149600 | -3.64777300 | 1.57232000  |
| H | 0.19390900  | -2.19640100 | 2.42635300  |
| C | 1.43621500  | -2.68698700 | 0.70182200  |
| H | 2.19318500  | -3.19882200 | 1.30452100  |
| H | 1.33843200  | -3.22540600 | -0.24710300 |
| F | -2.16017800 | 5.05373700  | -1.38438500 |
| F | -5.25816300 | 1.58464100  | -0.94904300 |
| C | -1.66692300 | 1.54529600  | -0.39788600 |
| N | 0.90506300  | 2.29954500  | -0.26755300 |

77

Complex 2c, ground state, gas phase

|    |             |             |             |
|----|-------------|-------------|-------------|
| Pt | 0.20618300  | 0.65101000  | -0.05039900 |
| P  | -2.02699300 | -0.29613600 | -0.17815100 |
| P  | 0.83359500  | -1.57126100 | -0.23770000 |
| F  | 3.35342400  | 4.90820900  | 0.52080500  |
| F  | 5.66215900  | 0.85380300  | 0.31664700  |
| N  | -0.28982800 | 2.71574600  | 0.13620300  |
| C  | -1.54156600 | 3.21268400  | 0.14013000  |
| H  | -2.34537200 | 2.49951400  | 0.03003300  |
| C  | -1.81618600 | 4.56661300  | 0.26166500  |
| H  | -2.84465300 | 4.90978600  | 0.25923200  |
| C  | -0.74176300 | 5.44695800  | 0.37817400  |
| H  | -0.90695200 | 6.51617100  | 0.47118400  |
| C  | 0.55333900  | 4.94516700  | 0.37402900  |
| H  | 1.39556000  | 5.61290500  | 0.46377600  |
| C  | 0.77714600  | 3.56319200  | 0.25582100  |
| C  | 2.08020500  | 2.89742400  | 0.25476100  |
| C  | 2.08679800  | 1.47768300  | 0.11843900  |
| C  | 3.30980400  | 3.56313500  | 0.39530400  |
| C  | 4.53118400  | 2.90851700  | 0.41850500  |
| H  | 5.45743800  | 3.45856300  | 0.52993700  |
| C  | 4.50249100  | 1.52867200  | 0.29389900  |
| C  | 3.31476100  | 0.81466700  | 0.14424200  |
| H  | 3.40138100  | -0.25776000 | 0.03823500  |
| C  | -3.28503900 | 0.55807700  | -1.20793400 |
| C  | -2.89997400 | 0.98207700  | -2.49294400 |
| H  | -1.88499000 | 0.80691100  | -2.84128300 |

|   |             |             |             |
|---|-------------|-------------|-------------|
| C | -3.81361000 | 1.63029800  | -3.32118800 |
| H | -3.50923400 | 1.95066700  | -4.31333600 |
| C | -5.11621300 | 1.87300400  | -2.87331700 |
| H | -5.82611100 | 2.38204400  | -3.51871700 |
| C | -5.50154600 | 1.46438200  | -1.59621600 |
| H | -6.51163100 | 1.65305500  | -1.24419100 |
| C | -4.59141800 | 0.80821200  | -0.76229300 |
| H | -4.90129800 | 0.49383600  | 0.22921400  |
| C | -2.79193300 | -0.59197300 | 1.46291000  |
| C | -2.40380700 | 0.22851300  | 2.53500400  |
| H | -1.64867600 | 0.99482400  | 2.38525900  |
| C | -2.97168700 | 0.05367400  | 3.79781000  |
| H | -2.66392300 | 0.69317400  | 4.61993300  |
| C | -3.92348400 | -0.94620500 | 4.00433500  |
| H | -4.36144400 | -1.08547800 | 4.98844600  |
| C | -4.30620500 | -1.77465300 | 2.94629200  |
| H | -5.03940100 | -2.55988100 | 3.10607300  |
| C | -3.74436000 | -1.60136300 | 1.68147100  |
| H | -4.04140800 | -2.26106900 | 0.87234700  |
| C | -1.84368500 | -1.93724400 | -0.98411300 |
| C | -2.91088900 | -2.60753500 | -1.59749500 |
| H | -3.89742900 | -2.15398900 | -1.61724200 |
| C | -2.70496200 | -3.84167000 | -2.21506800 |
| H | -3.53640100 | -4.35223600 | -2.69187800 |
| C | -1.42796600 | -4.40578800 | -2.24017900 |
| H | -1.26156000 | -5.35713000 | -2.73667700 |
| C | -0.35509600 | -3.73582900 | -1.65055700 |
| H | 0.64202700  | -4.16118600 | -1.70994900 |
| C | -0.55601400 | -2.50333200 | -1.01315300 |
| C | 2.25710900  | -1.97147100 | -1.31825100 |
| C | 2.34572500  | -1.33041400 | -2.56561600 |
| H | 1.60726300  | -0.58401800 | -2.84612900 |
| C | 3.38884300  | -1.63778800 | -3.43618400 |
| H | 3.45378900  | -1.13730900 | -4.39783600 |
| C | 4.35499400  | -2.57933200 | -3.06788600 |
| H | 5.17163700  | -2.81184000 | -3.74505500 |
| C | 4.27452600  | -3.21440400 | -1.82818700 |
| H | 5.02715900  | -3.94106500 | -1.53678000 |
| C | 3.22847300  | -2.91441800 | -0.95150200 |
| H | 3.17734900  | -3.40801100 | 0.01385200  |
| C | 1.13956900  | -2.35473500 | 1.39284700  |
| C | 1.71818100  | -1.58650700 | 2.41770000  |
| H | 1.95669900  | -0.54212700 | 2.24532500  |
| C | 1.98549000  | -2.16211700 | 3.65994500  |
| H | 2.43497600  | -1.56038400 | 4.44443900  |
| C | 1.67195000  | -3.50220100 | 3.89548700  |
| H | 1.87734200  | -3.94695300 | 4.86487600  |
| C | 1.08815900  | -4.26868200 | 2.88486300  |
| H | 0.83532900  | -5.30940100 | 3.06547900  |
| C | 0.82104800  | -3.70054800 | 1.63872500  |
| H | 0.35542200  | -4.30616100 | 0.86817700  |

93

Complex 3a, ground state, gas phase

|    |            |            |            |
|----|------------|------------|------------|
| Pt | 3.23431600 | 0.49204400 | 0.27460400 |
|----|------------|------------|------------|

|    |             |             |             |
|----|-------------|-------------|-------------|
| Pt | -3.28058100 | -0.41317700 | 0.44417200  |
| Cl | 2.48534400  | 2.29614900  | 1.80950200  |
| Cl | -2.67584400 | -1.89324700 | 2.35554300  |
| P  | 1.38271900  | -0.80638400 | 0.79977100  |
| P  | -1.44748300 | 0.94273300  | 0.92065300  |
| F  | 4.65599800  | -4.45660900 | -1.46887200 |
| F  | 7.35489000  | -0.86420500 | -2.76717300 |
| F  | -6.98454500 | 0.22299500  | -3.29048800 |
| F  | -4.40383100 | 4.03671500  | -2.47696900 |
| N  | 4.86503300  | 1.65991800  | -0.40596800 |
| N  | -4.85716000 | -1.70076600 | -0.14122800 |
| C  | 5.01925300  | 2.96666400  | -0.13511300 |
| H  | 4.29947100  | 3.38331200  | 0.55950100  |
| C  | 6.03545800  | 3.72466400  | -0.70347800 |
| H  | 6.12645300  | 4.77614900  | -0.45346100 |
| C  | 6.91171800  | 3.09934600  | -1.58899900 |
| H  | 7.71530400  | 3.65792200  | -2.06091300 |
| C  | 6.75449800  | 1.74682200  | -1.86960100 |
| H  | 7.42366200  | 1.24674900  | -2.55276600 |
| C  | 5.71666800  | 1.02326700  | -1.26095400 |
| C  | 5.43042500  | -0.40324500 | -1.41909500 |
| C  | 4.27092800  | -0.90736900 | -0.74998500 |
| C  | 4.04642600  | -2.28866100 | -0.77291100 |
| H  | 3.21441100  | -2.74600700 | -0.25538800 |
| C  | 4.90749900  | -3.13293000 | -1.46398300 |
| C  | 6.01673300  | -2.66977500 | -2.15836500 |
| H  | 6.67866900  | -3.33549200 | -2.69793900 |
| C  | 6.25320100  | -1.30578700 | -2.10995600 |
| C  | -0.01578700 | 0.03518800  | 1.72410200  |
| H  | 0.49375200  | 0.74457500  | 2.37902400  |
| H  | -0.49561600 | -0.73136600 | 2.33961500  |
| C  | 1.88921700  | -2.04096000 | 2.07608700  |
| C  | 1.67156700  | -3.42093900 | 1.97172700  |
| H  | 1.17365700  | -3.83551300 | 1.10210900  |
| C  | 2.10041100  | -4.27944800 | 2.98742900  |
| H  | 1.92892500  | -5.34810200 | 2.89190300  |
| C  | 2.74165400  | -3.76958800 | 4.11563100  |
| H  | 3.07145200  | -4.43961600 | 4.90495000  |
| C  | 2.96397800  | -2.39439000 | 4.22496800  |
| H  | 3.46945800  | -1.98989300 | 5.09752700  |
| C  | 2.54919600  | -1.53400900 | 3.21009000  |
| H  | 2.74872500  | -0.46852200 | 3.29013000  |
| C  | 0.61612500  | -1.72155000 | -0.59701900 |
| C  | -0.48157200 | -2.57354900 | -0.38375600 |
| H  | -0.90585500 | -2.69530500 | 0.60752700  |
| C  | -1.06309300 | -3.25189300 | -1.45712400 |
| H  | -1.91203000 | -3.90506500 | -1.27623900 |
| C  | -0.56627800 | -3.08225100 | -2.75050400 |
| H  | -1.02096000 | -3.61253400 | -3.58317900 |
| C  | 0.51142400  | -2.22228500 | -2.97196700 |
| H  | 0.89764600  | -2.07670500 | -3.97712900 |
| C  | 1.09782500  | -1.54292300 | -1.90357500 |
| H  | 1.92643300  | -0.86739700 | -2.08050200 |
| C  | -0.74973000 | 1.84739600  | -0.52603300 |

|   |             |             |             |
|---|-------------|-------------|-------------|
| C | -0.79278500 | 1.22314500  | -1.78334900 |
| H | -1.25558000 | 0.24739100  | -1.88424600 |
| C | -0.27056700 | 1.86167500  | -2.90747200 |
| H | -0.31218700 | 1.36589600  | -3.87340100 |
| C | 0.28443700  | 3.13803400  | -2.79405700 |
| H | 0.67942500  | 3.64122200  | -3.67269900 |
| C | 0.31791100  | 3.77057700  | -1.55076600 |
| H | 0.74135300  | 4.76642600  | -1.45447600 |
| C | -0.19250500 | 3.13005200  | -0.42040500 |
| H | -0.15585800 | 3.63699500  | 0.53566900  |
| C | -1.89605300 | 2.19985200  | 2.19264200  |
| C | -3.25776800 | 2.40921100  | 2.46749400  |
| H | -4.00603200 | 1.82071300  | 1.94621400  |
| C | -3.65227400 | 3.35245800  | 3.41734700  |
| H | -4.70958700 | 3.49861300  | 3.62033600  |
| C | -2.69402300 | 4.09395700  | 4.10903800  |
| H | -3.00129000 | 4.82522900  | 4.85202900  |
| C | -1.33803600 | 3.88692900  | 3.84877500  |
| H | -0.58415100 | 4.45504100  | 4.38684100  |
| C | -0.93666300 | 2.94589100  | 2.89976000  |
| H | 0.12379900  | 2.80543200  | 2.71508300  |
| C | -5.08611800 | -2.90802700 | 0.40276800  |
| H | -4.46302400 | -3.15646500 | 1.25424700  |
| C | -6.05485200 | -3.77116600 | -0.09399600 |
| H | -6.20999000 | -4.73511400 | 0.37844700  |
| C | -6.80120300 | -3.36277100 | -1.19853100 |
| H | -7.56265400 | -4.01106300 | -1.62331100 |
| C | -6.56980100 | -2.11182400 | -1.75887300 |
| H | -7.14062400 | -1.77900900 | -2.61202700 |
| C | -5.58714600 | -1.27109400 | -1.21102200 |
| C | -5.24870900 | 0.08464100  | -1.64591300 |
| C | -4.16608000 | 0.73061400  | -0.96817000 |
| C | -3.91610300 | 2.07602900  | -1.26268500 |
| H | -3.13198000 | 2.63773500  | -0.77403400 |
| C | -4.67426100 | 2.74258400  | -2.21850400 |
| C | -5.69917700 | 2.12994200  | -2.92653100 |
| H | -6.27766700 | 2.65616800  | -3.67547300 |
| C | -5.96373400 | 0.80703700  | -2.61328600 |

96

Complex 3b, ground state, gas phase

|    |            |             |             |
|----|------------|-------------|-------------|
| Pt | 4.31396500 | -0.54299300 | -0.41512100 |
| Cl | 4.89851000 | -2.71627400 | -1.42024500 |
| C  | 4.23010300 | 1.24531300  | 0.51660200  |
| C  | 5.13046900 | 2.22331300  | -0.01283300 |
| C  | 3.50475900 | 1.57855000  | 1.66909000  |
| C  | 5.16735500 | 3.49473200  | 0.57683500  |
| C  | 6.04630100 | 1.77139300  | -1.06513100 |
| C  | 3.60111900 | 2.85183700  | 2.21851500  |
| H  | 2.89141500 | 0.85308200  | 2.18862200  |
| C  | 4.40495300 | 3.84607800  | 1.68057000  |
| C  | 6.98394800 | 2.55059000  | -1.75962600 |
| H  | 4.46520100 | 4.83739800  | 2.11193700  |
| C  | 7.82785600 | 1.95022600  | -2.68844800 |
| H  | 7.04540600 | 3.61089600  | -1.56719400 |

|   |             |             |             |
|---|-------------|-------------|-------------|
| C | 6.77629200  | -0.14489600 | -2.21913000 |
| C | 7.73354600  | 0.57912200  | -2.92031600 |
| H | 8.55445100  | 2.55396600  | -3.22514700 |
| H | 6.62830400  | -1.21080200 | -2.35503900 |
| H | 8.37742700  | 0.07268600  | -3.63120100 |
| N | 5.96043000  | 0.43456300  | -1.32420600 |
| C | 1.60023400  | -2.72339200 | -0.78551500 |
| C | 1.63017500  | -2.51840200 | -2.17394300 |
| C | 0.93250500  | -3.84127900 | -0.26869000 |
| C | 0.99531400  | -3.41742100 | -3.02858000 |
| H | 2.17272300  | -1.67192600 | -2.58315800 |
| C | 0.30507800  | -4.74409800 | -1.13026300 |
| H | 0.89296400  | -4.01053000 | 0.80221500  |
| C | 0.33382300  | -4.53335400 | -2.50854500 |
| H | 1.03176700  | -3.25524000 | -4.10240200 |
| H | -0.21114100 | -5.60624400 | -0.71814700 |
| H | -0.15544400 | -5.23663600 | -3.17707200 |
| C | 2.44646600  | -2.18583100 | 1.97825000  |
| C | 1.67074800  | -1.78225700 | 3.07441000  |
| C | 3.42786200  | -3.17818300 | 2.15671400  |
| C | 1.86510200  | -2.36788000 | 4.32830100  |
| H | 0.91228000  | -1.01376200 | 2.96741500  |
| C | 3.60968600  | -3.76447000 | 3.40773400  |
| H | 4.04909000  | -3.47751900 | 1.31621700  |
| C | 2.83007700  | -3.36048800 | 4.49565400  |
| H | 1.25663900  | -2.04742700 | 5.16928200  |
| H | 4.36804900  | -4.53203700 | 3.53470900  |
| H | 2.97808800  | -3.81632500 | 5.47087600  |
| P | 2.31329500  | -1.43484900 | 0.31178600  |
| C | 0.93065400  | -0.17371400 | 0.35651200  |
| H | 1.05855500  | 0.38971800  | -0.57390700 |
| H | 1.15084100  | 0.51910600  | 1.16789000  |
| C | -0.49212900 | -0.73285500 | 0.46501600  |
| H | -0.66335800 | -1.28550700 | 1.39081700  |
| H | -0.69575800 | -1.44821700 | -0.33575600 |
| C | -1.43433200 | 1.45732200  | -1.16237100 |
| C | -1.45870300 | 0.74331400  | -2.37352800 |
| C | -1.08401800 | 2.81414800  | -1.18297200 |
| C | -1.12279500 | 1.37055700  | -3.57197200 |
| H | -1.75490300 | -0.30242100 | -2.38122300 |
| C | -0.75522500 | 3.44190200  | -2.38751400 |
| H | -1.07801100 | 3.39361900  | -0.26607100 |
| C | -0.76912900 | 2.72252700  | -3.58185500 |
| H | -1.14587200 | 0.80486500  | -4.49923100 |
| H | -0.49168800 | 4.49592000  | -2.38695500 |
| H | -0.51231000 | 3.21214800  | -4.51712200 |
| C | -1.70105100 | 1.61630200  | 1.81558600  |
| C | -0.55150700 | 2.38804600  | 2.07197400  |
| C | -2.74236300 | 1.62577100  | 2.75878000  |
| C | -0.44582200 | 3.13960400  | 3.24286700  |
| H | 0.26668800  | 2.41657800  | 1.36102700  |
| C | -2.63714700 | 2.38492900  | 3.92543900  |
| H | -3.63107200 | 1.02985400  | 2.57331400  |
| C | -1.48978800 | 3.14006600  | 4.17050000  |

|    |             |             |             |
|----|-------------|-------------|-------------|
| H  | 0.45962200  | 3.70795700  | 3.42853300  |
| H  | -3.45294100 | 2.38034400  | 4.64287800  |
| H  | -1.40628700 | 3.72585900  | 5.08193000  |
| P  | -1.88191300 | 0.51191100  | 0.35648300  |
| Pt | -3.95577500 | -0.50110800 | 0.20028300  |
| Cl | -3.02677700 | -2.58613300 | 1.15579100  |
| C  | -5.00126000 | 1.09798900  | -0.45797000 |
| C  | -6.34553500 | 0.79678300  | -0.84467300 |
| C  | -4.58638500 | 2.43305100  | -0.50786200 |
| C  | -7.16628000 | 1.84307800  | -1.29154100 |
| C  | -6.78203500 | -0.59284900 | -0.69330800 |
| C  | -5.45112000 | 3.42700000  | -0.95070200 |
| H  | -3.59285100 | 2.73956300  | -0.21210900 |
| C  | -6.75044700 | 3.16299600  | -1.36056700 |
| C  | -8.03600400 | -1.12366800 | -1.03524800 |
| H  | -7.41561000 | 3.94327000  | -1.70866100 |
| C  | -8.30420700 | -2.46840300 | -0.80498100 |
| H  | -8.78437200 | -0.48290200 | -1.47542700 |
| C  | -6.09653900 | -2.70760700 | 0.07871000  |
| C  | -7.32369900 | -3.27868200 | -0.23508100 |
| H  | -9.27531900 | -2.87699600 | -1.07057200 |
| H  | -5.28211000 | -3.27224100 | 0.51846700  |
| H  | -7.49361000 | -4.33134700 | -0.03663100 |
| N  | -5.83605600 | -1.40892500 | -0.14456300 |
| F  | 2.87502200  | 3.14390200  | 3.32328300  |
| F  | 5.98728900  | 4.45624100  | 0.08489900  |
| F  | -8.44372300 | 1.59757800  | -1.67764200 |
| F  | -5.01390800 | 4.70180900  | -0.98632300 |

70

Complex 2a, excited state, gas phase

|    |             |             |             |
|----|-------------|-------------|-------------|
| C  | 1.69311400  | 1.37198400  | 0.51713200  |
| C  | 1.48301800  | 2.72989100  | 0.89594200  |
| C  | 2.94391600  | 0.79839100  | 0.74674400  |
| C  | 2.55659900  | 3.43789000  | 1.46222000  |
| C  | 0.14186500  | 3.28067600  | 0.70257200  |
| C  | 3.96825500  | 1.55024500  | 1.31981800  |
| C  | 3.80513200  | 2.87823800  | 1.68220000  |
| C  | -0.24239300 | 4.61712900  | 0.89941700  |
| C  | -2.04985400 | 2.75805400  | 0.04132900  |
| C  | -1.55412100 | 5.00825200  | 0.66214400  |
| C  | -2.48062700 | 4.06409000  | 0.22191000  |
| N  | -0.78348600 | 2.36768600  | 0.28104300  |
| H  | 3.17777600  | -0.22386000 | 0.48412200  |
| H  | 4.60649300  | 3.45692100  | 2.12481100  |
| H  | 0.49049500  | 5.33745300  | 1.22789200  |
| H  | -2.73001200 | 1.99635300  | -0.31304200 |
| H  | -1.84571400 | 6.04306600  | 0.81434100  |
| H  | -3.51325800 | 4.32373400  | 0.01737600  |
| P  | 1.03821900  | -1.53686500 | -0.89216300 |
| Pt | -0.00175000 | 0.41723100  | -0.12959400 |
| P  | -2.18791000 | -0.67197200 | -0.29385500 |
| C  | 1.23060900  | -2.82940200 | 0.38662200  |
| C  | 1.32795100  | -2.46532500 | 1.73912300  |
| C  | 1.29422400  | -4.18723500 | 0.02792700  |



|   |             |             |             |
|---|-------------|-------------|-------------|
| C | 1.49700000  | -3.44658800 | 2.71651800  |
| H | 1.27156700  | -1.41901900 | 2.02365100  |
| C | 1.45815200  | -5.16313000 | 1.01071900  |
| H | 1.21578400  | -4.48123400 | -1.01503300 |
| C | 1.56117500  | -4.79365600 | 2.35420400  |
| H | 1.57501900  | -3.15846700 | 3.76070300  |
| H | 1.50464300  | -6.21046600 | 0.72720200  |
| H | 1.68939300  | -5.55569100 | 3.11743300  |
| C | 2.65382100  | -1.28555300 | -1.72687700 |
| C | 3.73255800  | -2.15909300 | -1.53132700 |
| C | 2.77637200  | -0.22017800 | -2.63358300 |
| C | 4.92176500  | -1.96626800 | -2.23841400 |
| H | 3.65344200  | -2.98304100 | -0.82950800 |
| C | 3.96279900  | -0.03956800 | -3.34249200 |
| H | 1.95268500  | 0.47536400  | -2.77265900 |
| C | 5.03759000  | -0.91098600 | -3.14377800 |
| H | 5.75640400  | -2.64229800 | -2.07798200 |
| H | 4.05215400  | 0.78664500  | -4.04176300 |
| H | 5.96404400  | -0.76368700 | -3.69100200 |
| C | -2.96859700 | -1.20401800 | 1.24338800  |
| C | -4.07018700 | -2.08742900 | 1.25720500  |
| C | -2.39754600 | -0.80699500 | 2.47070900  |
| C | -4.60060300 | -2.52991700 | 2.46613100  |
| H | -4.49929900 | -2.43872500 | 0.32385600  |
| C | -2.93709200 | -1.25221800 | 3.67555200  |
| H | -1.53819700 | -0.14222700 | 2.47344400  |
| C | -4.04014600 | -2.11035900 | 3.67679600  |
| H | -5.44718500 | -3.21022500 | 2.46457800  |
| H | -2.49829300 | -0.92766400 | 4.61457800  |
| H | -4.45753600 | -2.45796000 | 4.61720700  |
| C | -3.44053300 | -0.21765300 | -1.50837900 |
| C | -2.98987800 | 0.01694400  | -2.82887000 |
| C | -4.81403100 | -0.05156900 | -1.22134400 |
| C | -3.88473900 | 0.38540900  | -3.82784800 |
| H | -1.93409000 | -0.09226400 | -3.06296300 |
| C | -5.70163500 | 0.32019700  | -2.22816000 |
| H | -5.18118900 | -0.19837500 | -0.21143700 |
| C | -5.24413200 | 0.53431400  | -3.53218300 |
| H | -3.52500100 | 0.55714300  | -4.83808900 |
| H | -6.75419900 | 0.44945400  | -1.99326700 |
| H | -5.94203400 | 0.82199900  | -4.31281700 |
| C | 0.07838200  | -2.28819900 | -2.20412600 |
| H | -0.82427800 | -2.85094700 | -1.98912300 |
| H | 0.35369500  | -2.12001800 | -3.24024200 |
| F | 5.15742500  | 0.96560000  | 1.52595700  |
| F | 2.40300400  | 4.72601600  | 1.83797700  |

73

Complex 2b, excited state, gas phase

|   |             |            |             |
|---|-------------|------------|-------------|
| C | 0.01016200  | 3.31865200 | -0.64656500 |
| C | 2.19338700  | 2.54849600 | -0.11619000 |
| C | 0.55693700  | 4.62601600 | -0.89518700 |
| C | -1.33125100 | 2.94079400 | -0.70643600 |
| C | 2.73981800  | 3.81234100 | -0.32636600 |
| C | 1.89475400  | 4.87592500 | -0.74464000 |

|    |             |             |             |
|----|-------------|-------------|-------------|
| C  | -2.43883900 | 3.82582800  | -1.03208000 |
| C  | -2.97950500 | 1.11634600  | -0.53213200 |
| C  | -3.72369100 | 3.39731300  | -1.13034600 |
| C  | -3.98130500 | 2.02337300  | -0.88308600 |
| H  | 2.83393200  | 1.73787200  | 0.20663400  |
| H  | -0.11490500 | 5.41366000  | -1.20127400 |
| H  | 3.80208700  | 3.95985300  | -0.16717700 |
| H  | 2.29929600  | 5.86413400  | -0.93346500 |
| H  | -3.29356200 | 0.09862800  | -0.33871200 |
| H  | -4.52638100 | 4.08038300  | -1.38156800 |
| P  | 1.99183000  | -0.93559200 | 0.31630500  |
| Pt | -0.01494900 | 0.39655600  | 0.00472500  |
| P  | -1.11768000 | -1.58455100 | 0.49321900  |
| C  | 3.05491000  | -0.40999600 | 1.72416200  |
| C  | 2.42102200  | 0.15103700  | 2.84748700  |
| C  | 4.45094500  | -0.56063300 | 1.73279100  |
| C  | 3.16527500  | 0.52661200  | 3.96573700  |
| H  | 1.34580200  | 0.31174100  | 2.83517300  |
| C  | 5.19233400  | -0.17478800 | 2.85120600  |
| H  | 4.96481000  | -0.96731900 | 0.86813800  |
| C  | 4.55240700  | 0.36284500  | 3.96956800  |
| H  | 2.66381300  | 0.95679400  | 4.82789400  |
| H  | 6.27208300  | -0.29275800 | 2.84521500  |
| H  | 5.13315600  | 0.66177200  | 4.83730500  |
| C  | 3.07600400  | -1.16705900 | -1.14205900 |
| C  | 2.97049000  | -0.28652500 | -2.23011200 |
| C  | 3.98860800  | -2.23557200 | -1.21309600 |
| C  | 3.77469900  | -0.45928100 | -3.35829500 |
| H  | 2.24811000  | 0.52349800  | -2.20214600 |
| C  | 4.78834900  | -2.40568200 | -2.34294800 |
| H  | 4.07637800  | -2.94125800 | -0.39156600 |
| C  | 4.68489900  | -1.51562300 | -3.41511200 |
| H  | 3.68295900  | 0.22741200  | -4.19476200 |
| H  | 5.48844900  | -3.23484500 | -2.38730400 |
| H  | 5.30743600  | -1.65116100 | -4.29469200 |
| C  | -2.57245700 | -1.47227200 | 1.60279600  |
| C  | -3.75536300 | -2.19199700 | 1.37890900  |
| C  | -2.47373100 | -0.64251100 | 2.73325700  |
| C  | -4.81770100 | -2.09046800 | 2.28052300  |
| H  | -3.85737700 | -2.82425200 | 0.50325000  |
| C  | -3.53353400 | -0.55172000 | 3.63315700  |
| H  | -1.57512700 | -0.05325900 | 2.89761900  |
| C  | -4.70780600 | -1.27596500 | 3.40767900  |
| H  | -5.73153100 | -2.64770300 | 2.09650400  |
| H  | -3.44765800 | 0.09114400  | 4.50435100  |
| H  | -5.53602400 | -1.19892700 | 4.10597300  |
| C  | -1.57844700 | -2.59879300 | -0.95979500 |
| C  | -1.86821200 | -3.97016200 | -0.83515000 |
| C  | -1.62689800 | -2.00172000 | -2.22964300 |
| C  | -2.20370100 | -4.72347400 | -1.95966600 |
| H  | -1.84082300 | -4.45636200 | 0.13605100  |
| C  | -1.96629300 | -2.75983600 | -3.35170300 |
| H  | -1.39420400 | -0.94645900 | -2.33526400 |
| C  | -2.25396700 | -4.11892700 | -3.21865500 |

|   |             |             |             |
|---|-------------|-------------|-------------|
| H | -2.42482700 | -5.78138300 | -1.85263900 |
| H | -2.00168700 | -2.28764700 | -4.32905400 |
| H | -2.51483600 | -4.70829400 | -4.09285100 |
| C | 0.08471800  | -2.63264900 | 1.45712700  |
| H | -0.32067900 | -3.63985000 | 1.59999900  |
| H | 0.17107400  | -2.17658100 | 2.44964700  |
| C | 1.44029000  | -2.67223600 | 0.74642000  |
| H | 2.19471000  | -3.16705300 | 1.36634000  |
| H | 1.36066200  | -3.22569500 | -0.19547300 |
| F | -2.19039900 | 5.13237100  | -1.25073700 |
| F | -5.24480200 | 1.60070000  | -0.98946900 |
| C | -1.65567100 | 1.51592100  | -0.42406200 |
| N | 0.89651500  | 2.25791100  | -0.27952900 |

77

Complex 2c, excited state, gas phase

|    |             |             |             |
|----|-------------|-------------|-------------|
| Pt | 0.21863700  | 0.64521300  | -0.01703300 |
| P  | -2.02433000 | -0.25713900 | -0.19978900 |
| P  | 0.80534600  | -1.58869000 | -0.24798800 |
| F  | 3.45842100  | 4.90044000  | 0.38553300  |
| F  | 5.66128700  | 0.77511600  | 0.45035100  |
| N  | -0.24876700 | 2.67379000  | 0.20485900  |
| C  | -1.47231100 | 3.21180300  | 0.25735100  |
| H  | -2.30601200 | 2.52960600  | 0.16237800  |
| C  | -1.71971300 | 4.57481100  | 0.40975000  |
| H  | -2.74614800 | 4.92259200  | 0.43957800  |
| C  | -0.62464300 | 5.47391000  | 0.51637200  |
| H  | -0.79037700 | 6.53888200  | 0.63604000  |
| C  | 0.64451200  | 4.96373100  | 0.46546800  |
| H  | 1.49997600  | 5.61706300  | 0.54680700  |
| C  | 0.87530900  | 3.55099000  | 0.31337800  |
| C  | 2.10656700  | 2.89983200  | 0.27958900  |
| C  | 2.09336000  | 1.41546600  | 0.17665800  |
| C  | 3.40451200  | 3.55379700  | 0.36237100  |
| C  | 4.57526700  | 2.86870400  | 0.42437800  |
| H  | 5.52555000  | 3.38414200  | 0.49688300  |
| C  | 4.51046300  | 1.45211400  | 0.38049300  |
| C  | 3.30828600  | 0.75168600  | 0.24969700  |
| H  | 3.38258400  | -0.32597900 | 0.18859100  |
| C  | -3.24442900 | 0.66010000  | -1.22203100 |
| C  | -2.82037600 | 1.13821300  | -2.47519300 |
| H  | -1.79726500 | 0.96962200  | -2.80209200 |
| C  | -3.70503900 | 1.83309100  | -3.29719700 |
| H  | -3.37036300 | 2.19568300  | -4.26477500 |
| C  | -5.01719900 | 2.06852700  | -2.87435800 |
| H  | -5.70429700 | 2.61410800  | -3.51459200 |
| C  | -5.44125900 | 1.60599000  | -1.62828800 |
| H  | -6.45876300 | 1.78922500  | -1.29522000 |
| C  | -4.56035800 | 0.90316900  | -0.80110100 |
| H  | -4.90032600 | 0.54797900  | 0.16645900  |
| C  | -2.83220800 | -0.59150700 | 1.41427400  |
| C  | -2.45728200 | 0.19011600  | 2.51950500  |
| H  | -1.68546000 | 0.94676800  | 2.41039200  |
| C  | -3.05864800 | -0.01239700 | 3.76245700  |
| H  | -2.76131100 | 0.59773400  | 4.61039000  |

|   |             |             |             |
|---|-------------|-------------|-------------|
| C | -4.03028600 | -1.00271500 | 3.91661500  |
| H | -4.49392600 | -1.16399400 | 4.88550500  |
| C | -4.39956500 | -1.79340900 | 2.82559100  |
| H | -5.14790500 | -2.57162700 | 2.94432500  |
| C | -3.80503200 | -1.59135600 | 1.57996300  |
| H | -4.09281600 | -2.22199200 | 0.74476000  |
| C | -1.86060800 | -1.87497100 | -1.05663400 |
| C | -2.92972100 | -2.50070900 | -1.71171800 |
| H | -3.90622500 | -2.02599400 | -1.73318800 |
| C | -2.73758800 | -3.71671200 | -2.36914000 |
| H | -3.57030000 | -4.19226300 | -2.87881400 |
| C | -1.47239600 | -4.30631500 | -2.39155300 |
| H | -1.31618200 | -5.24269600 | -2.91888400 |
| C | -0.39713400 | -3.68047400 | -1.75871100 |
| H | 0.59205600  | -4.12443700 | -1.81551300 |
| C | -0.58464300 | -2.46724900 | -1.08222200 |
| C | 2.25050300  | -1.99052900 | -1.30221000 |
| C | 2.37736800  | -1.32631800 | -2.53425400 |
| H | 1.65317700  | -0.56720700 | -2.81757400 |
| C | 3.43799200  | -1.62814900 | -3.38550500 |
| H | 3.53044100  | -1.11090500 | -4.33604300 |
| C | 4.38553000  | -2.58679500 | -3.01273700 |
| H | 5.21555500  | -2.81554200 | -3.67481000 |
| C | 4.26804500  | -3.24453200 | -1.78804500 |
| H | 5.00531600  | -3.98535000 | -1.49285400 |
| C | 3.20337200  | -2.95071800 | -0.93155200 |
| H | 3.12312700  | -3.46436100 | 0.02118900  |
| C | 1.05724000  | -2.43475700 | 1.36223000  |
| C | 1.56920700  | -1.69808400 | 2.44347500  |
| H | 1.78312600  | -0.64062300 | 2.32490900  |
| C | 1.79524800  | -2.31904500 | 3.67223500  |
| H | 2.19280500  | -1.74067800 | 4.50115700  |
| C | 1.50493000  | -3.67460000 | 3.83782200  |
| H | 1.67687400  | -4.15503200 | 4.79665300  |
| C | 0.98580300  | -4.41081900 | 2.77074300  |
| H | 0.75009600  | -5.46352500 | 2.89699800  |
| C | 0.76138700  | -3.79677200 | 1.53815300  |
| H | 0.34528900  | -4.37962200 | 0.72289200  |

93

Complex 3a, excited state, gas phase

|    |             |             |             |
|----|-------------|-------------|-------------|
| Pt | 3.19742700  | 0.45459500  | 0.28988400  |
| Pt | -3.27453400 | -0.35645800 | 0.43898800  |
| Cl | 2.54217100  | 2.20012400  | 1.92799400  |
| Cl | -2.78753800 | -1.78099800 | 2.42569300  |
| P  | 1.35510100  | -0.85728700 | 0.87643900  |
| P  | -1.42187200 | 0.95775700  | 0.94741900  |
| F  | 4.69109600  | -4.46192000 | -1.47400100 |
| F  | 6.81571200  | -0.73956200 | -3.39497100 |
| F  | -6.80793300 | 0.24762100  | -3.46174600 |
| F  | -4.18243000 | 4.03037700  | -2.64594200 |
| N  | 4.78071700  | 1.63359100  | -0.40728100 |
| N  | -4.85686100 | -1.62456300 | -0.17096800 |
| C  | 5.02841200  | 2.90182900  | -0.07079600 |
| H  | 4.35741000  | 3.32707200  | 0.66674900  |

|   |             |             |             |
|---|-------------|-------------|-------------|
| C | 6.07260500  | 3.64317200  | -0.62153500 |
| H | 6.21533500  | 4.67139700  | -0.30828500 |
| C | 6.92081300  | 3.03514100  | -1.58637300 |
| H | 7.74160300  | 3.59147100  | -2.02795500 |
| C | 6.69203000  | 1.73187500  | -1.94521200 |
| H | 7.32360800  | 1.23733200  | -2.66942300 |
| C | 5.61433300  | 0.99170200  | -1.35566600 |
| C | 5.27970900  | -0.34672900 | -1.57514200 |
| C | 4.18858100  | -0.92504500 | -0.73926400 |
| C | 4.04974300  | -2.31580700 | -0.70160800 |
| H | 3.32885300  | -2.79776700 | -0.05331400 |
| C | 4.82291200  | -3.12196400 | -1.51922800 |
| C | 5.75438400  | -2.59241700 | -2.45969500 |
| H | 6.29497400  | -3.24818900 | -3.13240100 |
| C | 5.94342300  | -1.24690500 | -2.48972600 |
| C | -0.03402600 | 0.01211900  | 1.78379700  |
| H | 0.48162200  | 0.70720300  | 2.44933400  |
| H | -0.54468900 | -0.74125300 | 2.39084500  |
| C | 1.88332500  | -2.04926400 | 2.18480800  |
| C | 1.68756800  | -3.43492800 | 2.11216800  |
| H | 1.19065200  | -3.87619700 | 1.25518900  |
| C | 2.13588500  | -4.26392900 | 3.14412300  |
| H | 1.98127300  | -5.33707800 | 3.07313600  |
| C | 2.77476800  | -3.71884400 | 4.25698800  |
| H | 3.11955600  | -4.36569700 | 5.05912300  |
| C | 2.97583800  | -2.33809800 | 4.33418800  |
| H | 3.47969600  | -1.90632100 | 5.19450800  |
| C | 2.54250400  | -1.50688900 | 3.30295000  |
| H | 2.72752900  | -0.43728200 | 3.35760800  |
| C | 0.56747700  | -1.83379300 | -0.46740300 |
| C | -0.53141200 | -2.66729900 | -0.19372700 |
| H | -0.94331500 | -2.73392900 | 0.80787800  |
| C | -1.13085800 | -3.39997000 | -1.22020900 |
| H | -1.98018400 | -4.03763600 | -0.99213500 |
| C | -0.65220600 | -3.30304400 | -2.52778400 |
| H | -1.12136900 | -3.87477700 | -3.32417800 |
| C | 0.42573700  | -2.46178100 | -2.81028200 |
| H | 0.79768200  | -2.37194800 | -3.82730600 |
| C | 1.03102500  | -1.72949000 | -1.78817400 |
| H | 1.85993300  | -1.06936500 | -2.01360500 |
| C | -0.65805000 | 1.83348100  | -0.48334700 |
| C | -0.66138000 | 1.19215300  | -1.73288800 |
| H | -1.13769600 | 0.22356500  | -1.83937600 |
| C | -0.08325000 | 1.80575300  | -2.84338500 |
| H | -0.09501600 | 1.29770300  | -3.80378200 |
| C | 0.48829300  | 3.07446700  | -2.72499600 |
| H | 0.92749900  | 3.55821700  | -3.59340100 |
| C | 0.48120100  | 3.72462700  | -1.49044600 |
| H | 0.91662400  | 4.71495700  | -1.39113900 |
| C | -0.08533900 | 3.10882600  | -0.37303500 |
| H | -0.08041800 | 3.62928100  | 0.57669400  |
| C | -1.86317800 | 2.23455400  | 2.20078100  |
| C | -3.22451800 | 2.48968300  | 2.43549700  |
| H | -3.97640000 | 1.92203800  | 1.89642000  |

|   |             |             |             |
|---|-------------|-------------|-------------|
| C | -3.61444800 | 3.45110700  | 3.36882600  |
| H | -4.67164700 | 3.63286500  | 3.54122700  |
| C | -2.65217000 | 4.16513800  | 4.08351000  |
| H | -2.95610700 | 4.91042300  | 4.81380300  |
| C | -1.29679300 | 3.91295200  | 3.86269200  |
| H | -0.54032700 | 4.45991400  | 4.41870900  |
| C | -0.90005700 | 2.95361000  | 2.93022000  |
| H | 0.16001900  | 2.77860500  | 2.77516500  |
| C | -5.13606200 | -2.80876300 | 0.39950700  |
| H | -4.55637300 | -3.04285100 | 1.28508700  |
| C | -6.10133100 | -3.66673900 | -0.11274200 |
| H | -6.29871200 | -4.61158800 | 0.38200600  |
| C | -6.78939800 | -3.27821900 | -1.26149100 |
| H | -7.54573800 | -3.92374400 | -1.69940600 |
| C | -6.50614000 | -2.05077500 | -1.84933500 |
| H | -7.03156900 | -1.73331700 | -2.73684400 |
| C | -5.52996500 | -1.21375500 | -1.28453900 |
| C | -5.14332300 | 0.12058800  | -1.74456200 |
| C | -4.07512700 | 0.76311400  | -1.04128300 |
| C | -3.78524000 | 2.09466900  | -1.36074000 |
| H | -3.00988500 | 2.65376000  | -0.85532000 |
| C | -4.49006500 | 2.74950100  | -2.36438900 |
| C | -5.49786300 | 2.13788400  | -3.09748200 |
| H | -6.03421600 | 2.65464900  | -3.88346100 |
| C | -5.80303900 | 0.82979600  | -2.75974300 |

96

Complex 3b, excited state, gas phase

|    |             |             |             |
|----|-------------|-------------|-------------|
| Pt | 4.20213100  | -0.62900300 | -0.62963900 |
| Cl | 4.53278600  | -2.59765800 | -2.07524600 |
| C  | 4.31893500  | 0.94035000  | 0.63438000  |
| C  | 5.29455100  | 1.91872200  | 0.26245900  |
| C  | 3.65783600  | 1.10612000  | 1.85921700  |
| C  | 5.46883500  | 3.04207300  | 1.08308100  |
| C  | 6.13157900  | 1.60330700  | -0.89934200 |
| C  | 3.88939800  | 2.23450300  | 2.63755900  |
| H  | 2.98895300  | 0.35233800  | 2.25490200  |
| C  | 4.77213200  | 3.23797500  | 2.26579200  |
| C  | 7.12319900  | 2.41544900  | -1.47033600 |
| H  | 4.93801700  | 4.11692800  | 2.87599900  |
| C  | 7.87653500  | 1.93796400  | -2.53788900 |
| H  | 7.29620900  | 3.40510600  | -1.07579700 |
| C  | 6.63398400  | -0.10209800 | -2.44105700 |
| C  | 7.63889700  | 0.65597600  | -3.03056000 |
| H  | 8.64494700  | 2.56701000  | -2.97873100 |
| H  | 6.37669600  | -1.10097000 | -2.77656800 |
| H  | 8.20881900  | 0.24492200  | -3.85677700 |
| N  | 5.90526000  | 0.35933500  | -1.41224100 |
| C  | 1.28618700  | -2.45789200 | -1.26470800 |
| C  | 1.25883900  | -1.97447900 | -2.58246200 |
| C  | 0.56420500  | -3.61366200 | -0.94093300 |
| C  | 0.51016400  | -2.63342400 | -3.55587600 |
| H  | 1.84562200  | -1.10066900 | -2.84876600 |
| C  | -0.17622600 | -4.27695600 | -1.92280300 |
| H  | 0.57424400  | -3.99960300 | 0.07313500  |

|    |             |             |             |
|----|-------------|-------------|-------------|
| C  | -0.20765500 | -3.78719900 | -3.22831700 |
| H  | 0.50225300  | -2.25649100 | -4.57498700 |
| H  | -0.72912700 | -5.17483900 | -1.66143900 |
| H  | -0.78455000 | -4.30417800 | -3.99039100 |
| C  | 2.26558700  | -2.54008300 | 1.50410100  |
| C  | 1.48965600  | -2.35201400 | 2.65723500  |
| C  | 3.21798700  | -3.57553900 | 1.47460800  |
| C  | 1.65874200  | -3.19021900 | 3.76255600  |
| H  | 0.74845600  | -1.56179800 | 2.71064100  |
| C  | 3.37462900  | -4.41277600 | 2.57758800  |
| H  | 3.83405100  | -3.71436900 | 0.58970800  |
| C  | 2.59729000  | -4.22094200 | 3.72359900  |
| H  | 1.04981800  | -3.03528400 | 4.64861700  |
| H  | 4.11112200  | -5.21084100 | 2.54441400  |
| H  | 2.72564200  | -4.87230900 | 4.58387900  |
| P  | 2.15415100  | -1.47092000 | 0.01987300  |
| C  | 0.89669700  | -0.12879400 | 0.37473800  |
| H  | 1.08466000  | 0.62713600  | -0.39482600 |
| H  | 1.16949700  | 0.32544200  | 1.32698700  |
| C  | -0.57244200 | -0.56313300 | 0.37133700  |
| H  | -0.79479200 | -1.31709100 | 1.12891900  |
| H  | -0.84249000 | -1.01852100 | -0.58593700 |
| C  | -1.36637300 | 2.04245000  | -0.60177100 |
| C  | -1.22817300 | 1.63418500  | -1.94017400 |
| C  | -1.17688100 | 3.39563200  | -0.28495600 |
| C  | -0.89134200 | 2.55486900  | -2.93088100 |
| H  | -1.39408000 | 0.59627500  | -2.21527800 |
| C  | -0.84623400 | 4.31741300  | -1.28197100 |
| H  | -1.29308300 | 3.73766000  | 0.73788800  |
| C  | -0.69921700 | 3.90002400  | -2.60423600 |
| H  | -0.78558300 | 2.22245200  | -3.95979000 |
| H  | -0.70598900 | 5.36240400  | -1.01983600 |
| H  | -0.44156700 | 4.61761600  | -3.37813100 |
| C  | -1.52911500 | 1.51903300  | 2.29312600  |
| C  | -0.31570200 | 2.15713900  | 2.61306900  |
| C  | -2.51842200 | 1.41113700  | 3.28315000  |
| C  | -0.09269700 | 2.65709100  | 3.89627300  |
| H  | 0.45715200  | 2.28261700  | 1.86220200  |
| C  | -2.29708600 | 1.92440700  | 4.56239000  |
| H  | -3.45141000 | 0.90871900  | 3.05172700  |
| C  | -1.08504600 | 2.54197600  | 4.87247000  |
| H  | 0.86034300  | 3.12142100  | 4.12779600  |
| H  | -3.07288500 | 1.83174200  | 5.31720700  |
| H  | -0.91149200 | 2.93232300  | 5.87172800  |
| P  | -1.85232500 | 0.77441300  | 0.64428100  |
| Pt | -3.94612100 | -0.23590600 | 0.43127400  |
| Cl | -3.11362300 | -1.90892400 | 2.06955500  |
| C  | -4.90915500 | 1.07392100  | -0.71562300 |
| C  | -6.18376500 | 0.52640600  | -1.27158200 |
| C  | -4.59329600 | 2.40480500  | -0.98966700 |
| C  | -6.90079200 | 1.36037400  | -2.21044600 |
| C  | -6.60670700 | -0.71774300 | -0.80275200 |
| C  | -5.39304300 | 3.16805300  | -1.82627400 |
| H  | -3.70980400 | 2.87390200  | -0.58095400 |

|   |             |             |             |
|---|-------------|-------------|-------------|
| C | -6.54571500 | 2.64504200  | -2.47552800 |
| C | -7.82225900 | -1.41373800 | -1.12214900 |
| H | -7.12040400 | 3.25345900  | -3.16409000 |
| C | -8.10787600 | -2.62227200 | -0.54410800 |
| H | -8.50865900 | -0.96003600 | -1.82226700 |
| C | -6.00450100 | -2.48867200 | 0.66710300  |
| C | -7.18002400 | -3.18167600 | 0.37852300  |
| H | -9.02949800 | -3.14310900 | -0.78355300 |
| H | -5.26803100 | -2.88144100 | 1.35942600  |
| H | -7.36296200 | -4.13632400 | 0.85895500  |
| N | -5.70201400 | -1.31116500 | 0.11700800  |
| F | 3.22229800  | 2.37041600  | 3.80705600  |
| F | 6.36424600  | 4.00418100  | 0.74904600  |
| F | -7.98995200 | 0.85605600  | -2.84037800 |
| F | -5.07564700 | 4.45324500  | -2.07686400 |
